# Supplementary figures and images for: Eye-tracking-based visual field analysis (EFA): a reliable and precise perimetric methodology for the assessment of visual field defects
Source: HighWire-hosted journal article supplement (doi:10.1136/bmjophth-2019-000429), 2021-03-01

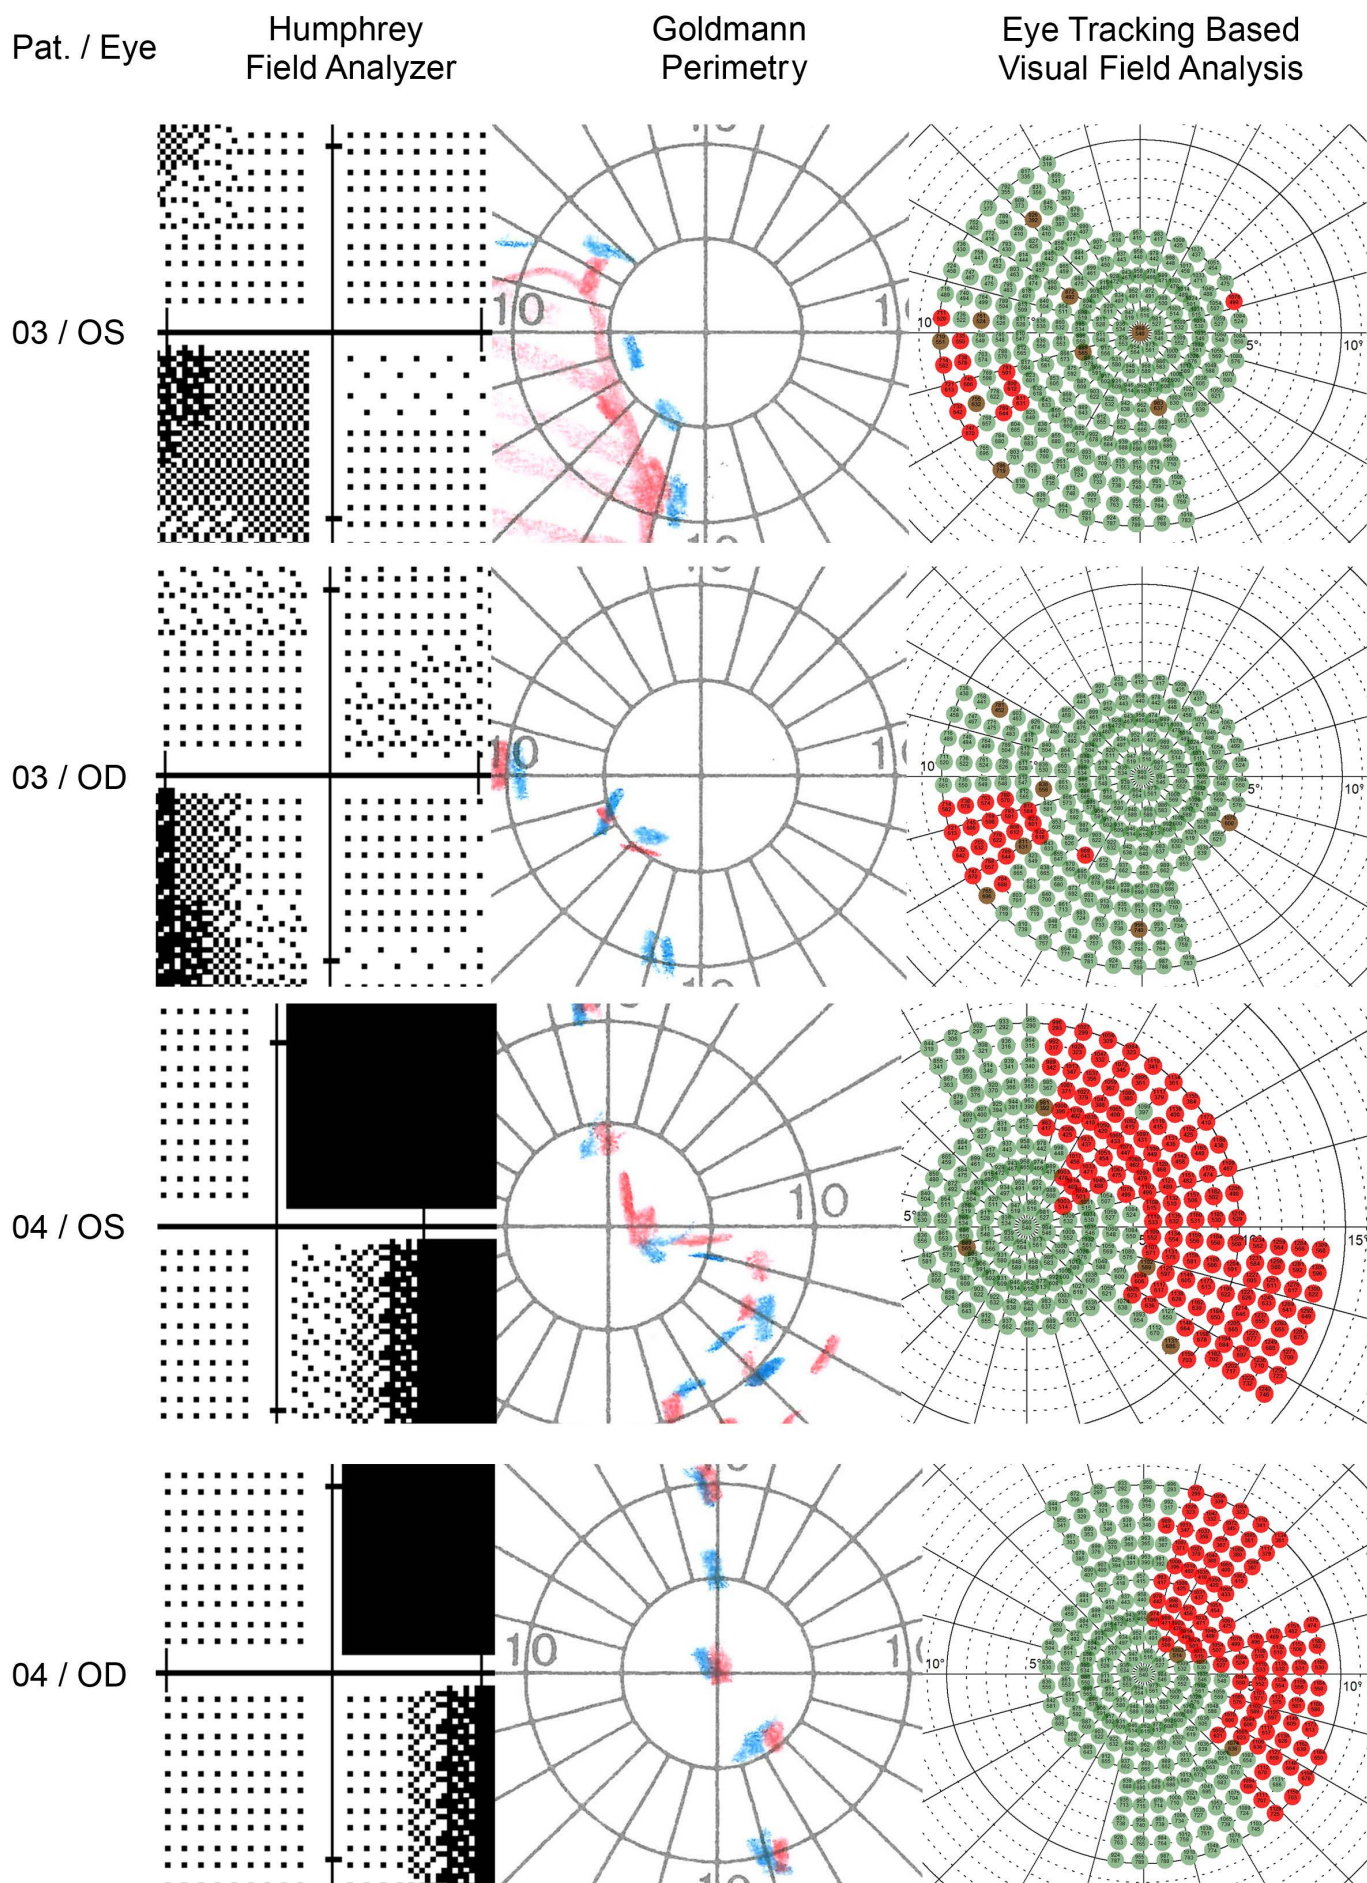

Supplement: bmjophth-2019-000429supp002_data_supplement.pdf [file bmjophth-2019-000429supp002_data_supplement.pdf]

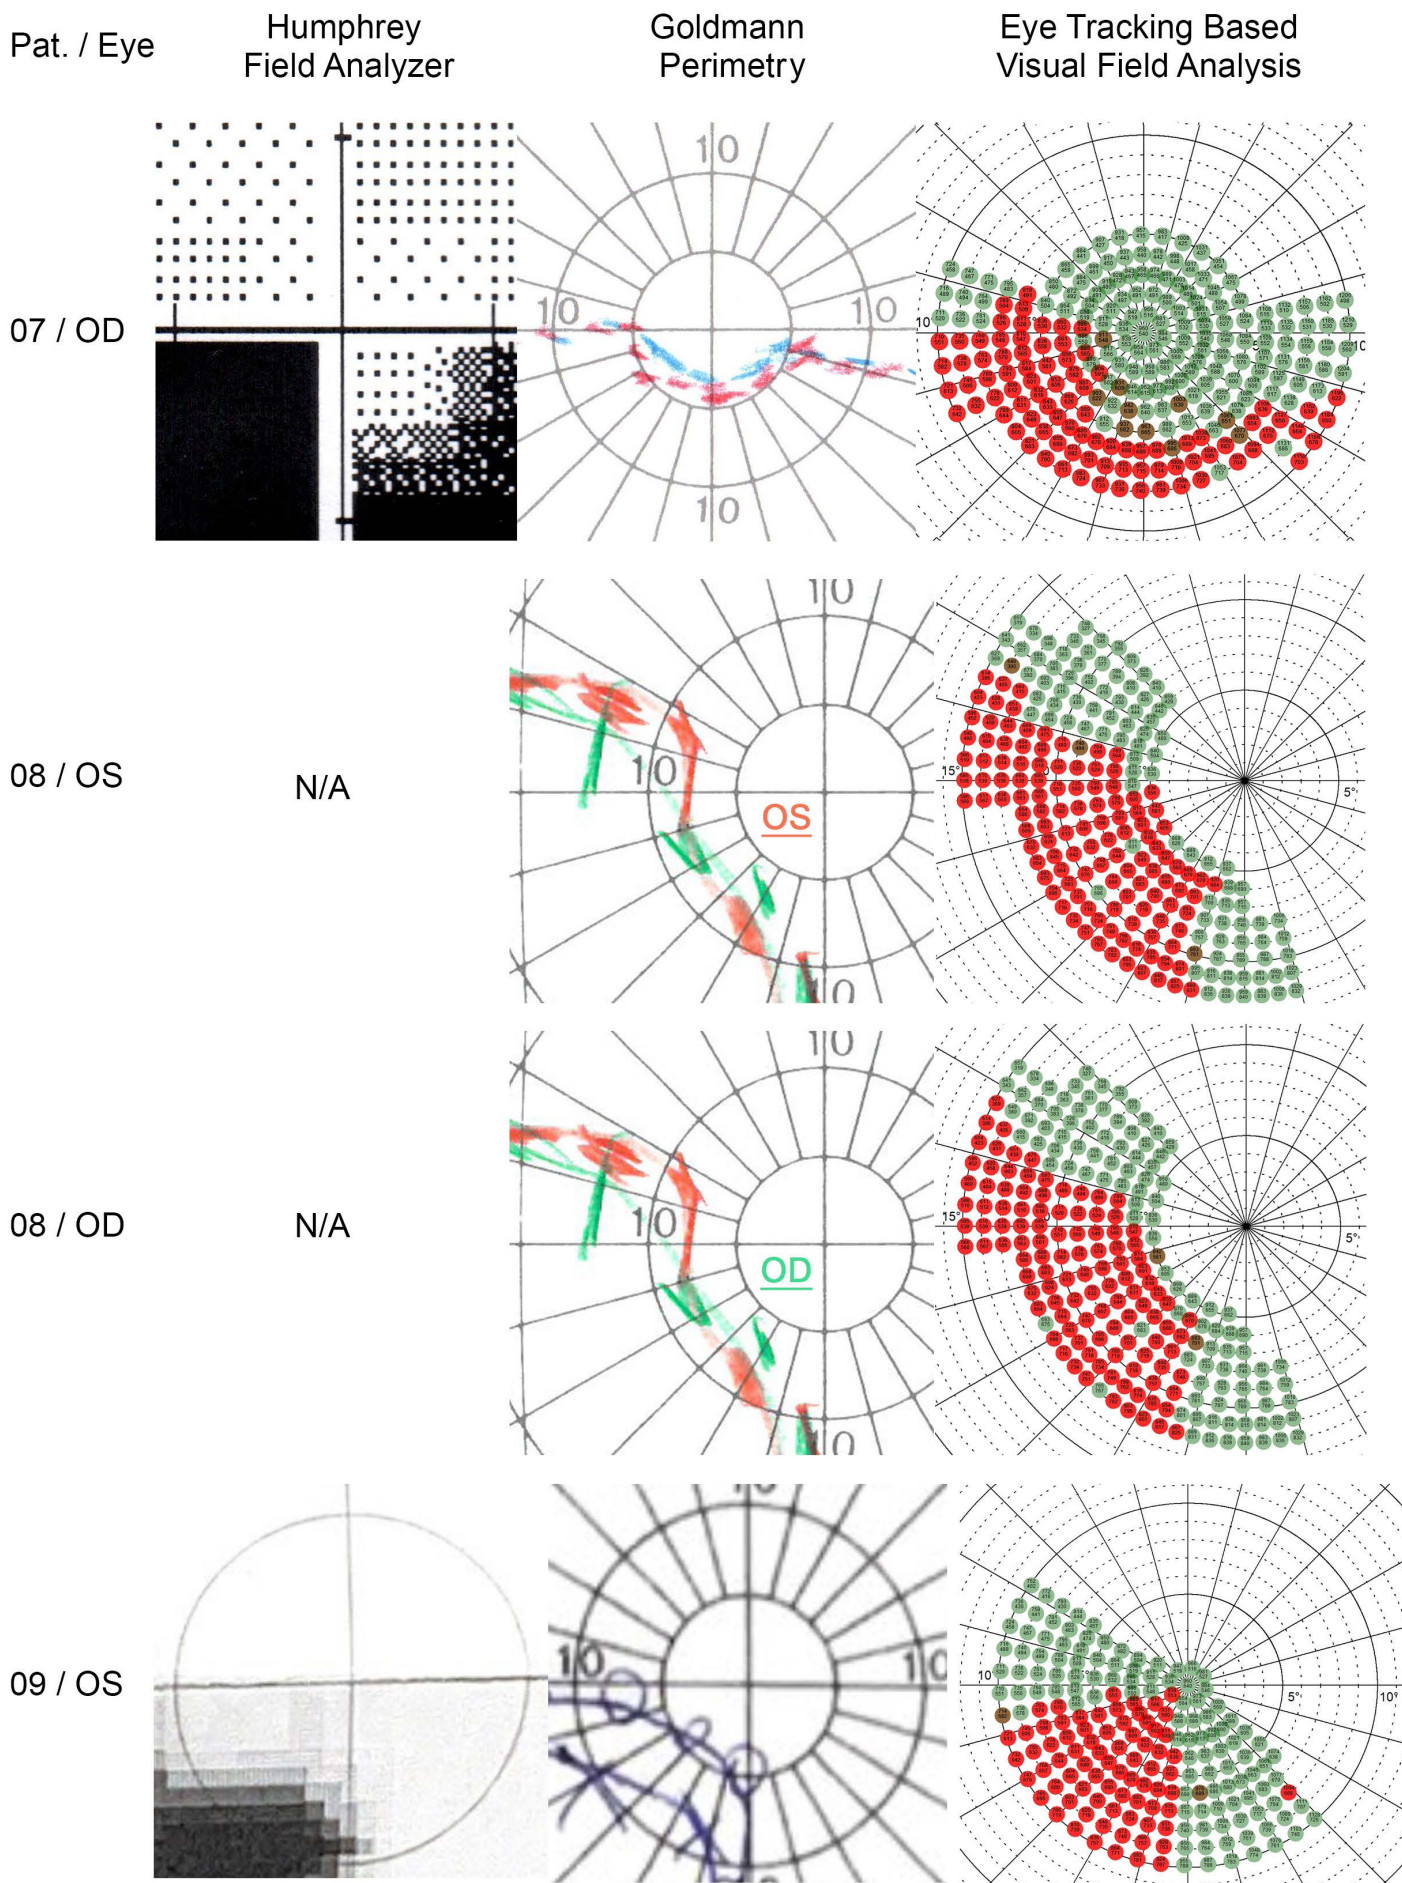

Supplement: bmjophth-2019-000429supp004_data_supplement.pdf [file bmjophth-2019-000429supp004_data_supplement.pdf]

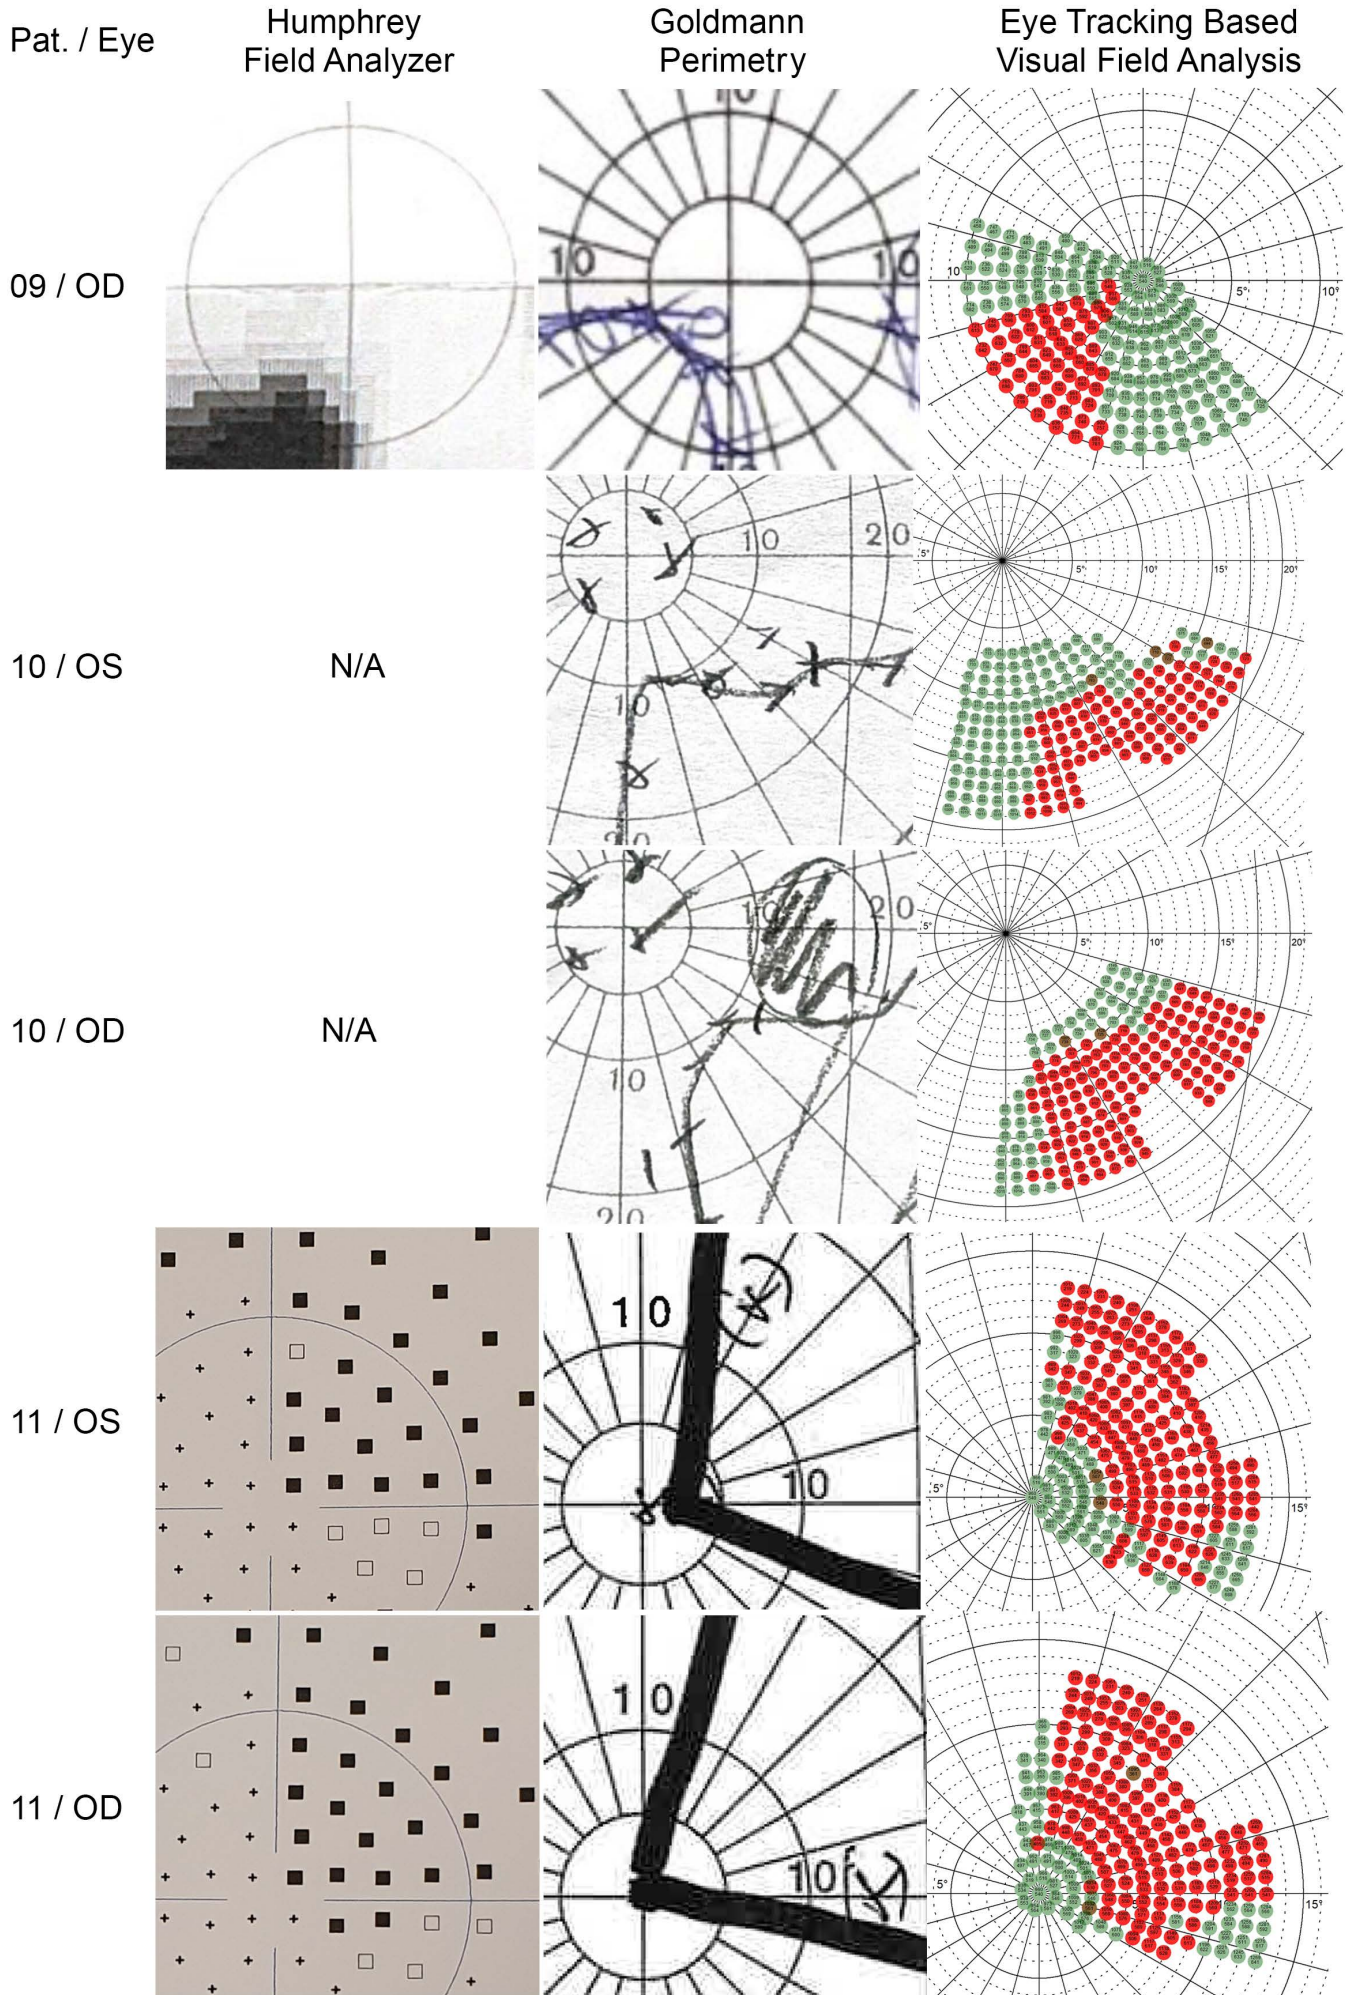

Supplement: bmjophth-2019-000429supp005_data_supplement.pdf [file bmjophth-2019-000429supp005_data_supplement.pdf]
